# Supplementary material for: Predicting functional outcomes of posterior circulation acute ischemic stroke in first 36 h of stroke onset
Source: PubMed Central journal article supplement (PMC5878189; doi:10.1007/s00415-018-8746-6), 2018-02-17
Supplement: 415_2018_8746_MOESM1_ESM.pdf [file 415_2018_8746_MOESM1_ESM.pdf]

## **ONLINE SUPPLEMENT**

Total number of figures: 1

Total number of tables: 3

## Supplemental Figure

Sample Size = 30

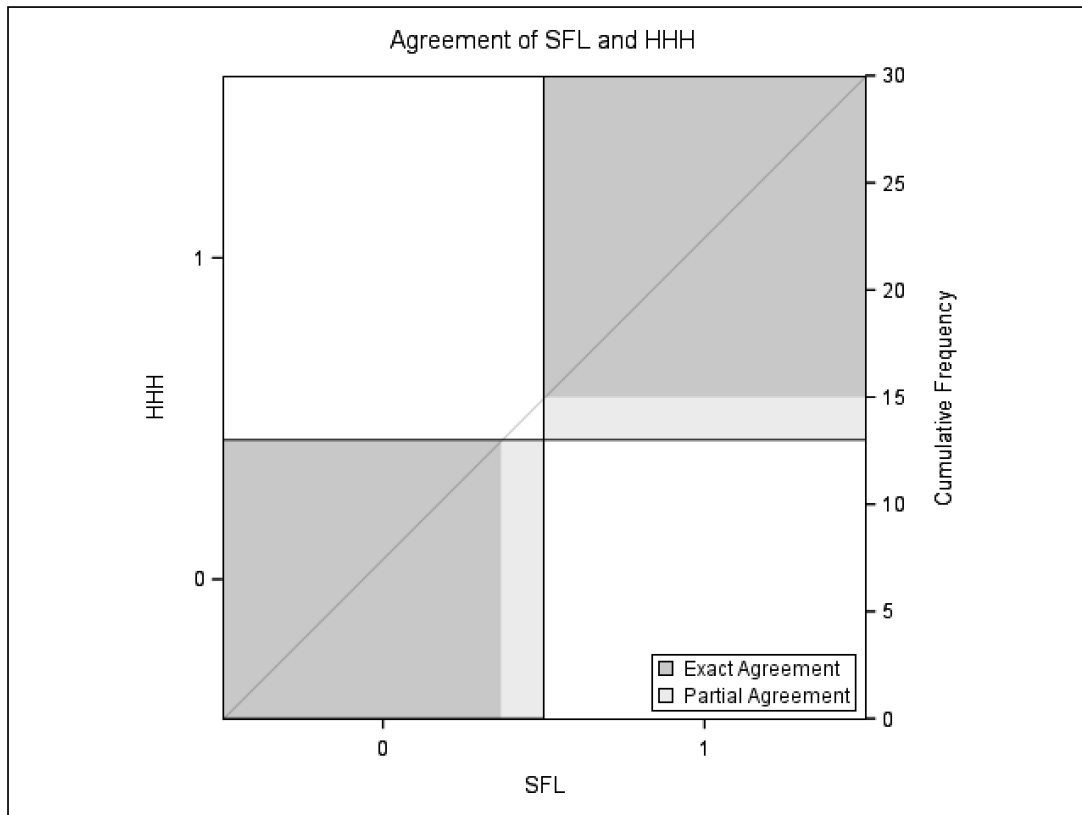

**Fig. I Agreement chart of the PC-ASPECTS ( $\leq 7$  vs  $> 7$  score) between two stroke neurologists (SFL, HHH) with a sample of 30 MRI scans. The interrater reliability for the PC-ASPECTS ( $\leq 7$  vs  $> 7$  score) was excellent ( $\kappa = 0.87$ , 95% CI, 0.690–1.000).**

## Supplemental Tables

**Table I.** Assessment of continuous variable distribution ( $N = 125$ )

| Variables      | Min. | Max. | Mean $\pm$ SD   | Kolmogorov–Smirnov |                | Shapiro–Wilk |                |
|----------------|------|------|-----------------|--------------------|----------------|--------------|----------------|
|                |      |      |                 | Statistics         | <i>P</i> value | Statistics   | <i>P</i> value |
| Age (years)    | 35   | 95   | 70.3 $\pm$ 13.8 | 0.0688             | >0.1500        | 0.9797       | 0.0573         |
| Baseline NIHSS | 0    | 34   | 3.8 $\pm$ 5.0   | 0.2339             | <0.0100*       | 0.6430       | <0.0001*       |
| PC-ASPECTS     | 0    | 10   | 8.0 $\pm$ 1.6   | 0.3002             | <0.0001*       | 0.7723       | <0.0001*       |
| mRS            | 0    | 6    | 2.2 $\pm$ 1.5   | 0.2106             | <0.0100*       | 0.8988       | <0.0001*       |

Max., maximum; Min., minimum; mRS, modified Rankin Scale; NIHSS, The National Institutes of Health Stroke Scale; PC-ASPECTS, posterior circulation Alberta stroke program early computed tomography score; SD, standard deviation. \*Statistical significance ( $\alpha = 0.05$ ).

**Table II.** Youden index score for the PC-ASPECTS

| PC-ASPECTS        | 0    | 1    | 2    | 4    | 5    | 6    | 7*   | 8    | 9    | 10   |
|-------------------|------|------|------|------|------|------|------|------|------|------|
| 1-Specificity (%) | 0    | 0    | 0    | 0    | 0    | 3.8  | 5.0  | 42.5 | 37.5 | 11.3 |
| Sensitivity (%)   | 97.8 | 97.8 | 97.8 | 97.8 | 97.8 | 80.0 | 93.3 | 62.2 | 82.2 | 93.3 |

PC-ASPECTS, posterior circulation Alberta stroke program early computed tomography score.

Scores of 0–5 were outlier data.

**Table III.** Prediction of unfavorable functional outcomes with respect to each baseline NIHSS score

|                   |      |      |      |      |      |      |      |      |      |
|-------------------|------|------|------|------|------|------|------|------|------|
| Baseline NIHSS    | 0    | 1    | 2    | 3    | 4    | 5    | 6    | 7    | 8    |
| 1-Specificity (%) | 20.0 | 21.3 | 17.5 | 13.8 | 13.8 | 7.5  | 3.8  | 1.3  | 1.3  |
| Sensitivity (%)   | 80.0 | 95.6 | 95.6 | 91.1 | 82.2 | 91.1 | 95.6 | 93.3 | 95.6 |
| Baseline NIHSS    | 9    | 11   | 12   | 17   | 18   | 19   | 28   | 34   |      |
| 1-Specificity (%) | 0.0  | 0.0  | 0.0  | 0.0  | 0.0  | 0.0  | 0.0  | 0.0  | 0.0  |
| Sensitivity (%)   | 97.8 | 97.8 | 97.8 | 95.6 | 97.8 | 97.8 | 97.8 | 97.8 | 97.8 |

NIHSS, National Institutes of Health Stroke Scale
